# Supplementary material for: Pancreatlas: Applying an Adaptable Framework to Map the Human Pancreas in Health and Disease
Source: PubMed Central journal article supplement — Patterns (N Y). 2020 Oct 5;1(8):100120. doi: 10.1016/j.patter.2020.100120 (PMC7691395; doi:10.1016/j.patter.2020.100120), 2020-10-05
Supplement: mmc1.pdf [file mmc1.pdf]

**PATTER, Volume 1**

**Supplemental Information**

**Pancreatlas: Applying an Adaptable Framework  
to Map the Human Pancreas in Health and Disease**

**Diane C. Saunders, James Messmer, Irina Kusmartseva, Maria L. Beery, Mingder Yang, Mark A. Atkinson, Alvin C. Powers, Jean-Philippe Cartailier, and Marcela Brissova**

**Table S1. Related to Figures 1-2. Glossary of abbreviations and technical terms**

| Term/ Abbreviation     | Description                                                                                                                                                                                             |
|------------------------|---------------------------------------------------------------------------------------------------------------------------------------------------------------------------------------------------------|
| <b>API</b>             | Application program interface; a piece of code that defines interactions between two different systems or entities.                                                                                     |
| <b>Client</b>          | End user's machine, that makes requests to servers.                                                                                                                                                     |
| <b>Components</b>      | Reusable pieces of React code that define a certain part of the user interface.                                                                                                                         |
| <b>Django</b>          | Popular framework for creating web applications, written in Python.                                                                                                                                     |
| <b>FFIND</b>           | Flexible Framework for Integrating and Navigating Data; a platform engineered by the authors to enhance existing databases that includes a customizable API (back-end) and web application (front-end). |
| <b>JavaScript</b>      | Programming language to create and control dynamic web content.                                                                                                                                         |
| <b>Metadata</b>        | Relevant experimental information associated with a piece of data; descriptor of data.                                                                                                                  |
| <b>OMERO</b>           | Open Microscopy Environment Remote Objects; a client-server software for management, visualization, and analysis of biological microscopy images. See also References [6] and [7].                      |
| <b>Python</b>          | High-level, general-purpose programming language.                                                                                                                                                       |
| <b>React</b>           | Open-source library for building web application user interfaces, written in JavaScript.                                                                                                                |
| <b>REST</b>            | Representational state transfer; an architectural style that defines a set of best practices for creating web services.                                                                                 |
| <b>Server</b>          | Machines hosting web applications and/or software.                                                                                                                                                      |
| <b>SQL</b>             | Structured Query Language; the standard language for relational database management systems.                                                                                                            |
| <b>Storage</b>         | Local storage is physically attached to a machine, whereas network-attached storage is connected via a network connection.                                                                              |
| <b>UI</b>              | User interface; the visual elements to software with which the user interacts to read information and input commands.                                                                                   |
| <b>VM</b>              | Virtual machine; a piece of software that emulates the function of a full computer and is capable of performing all tasks of a physical machine.                                                        |
| <b>Web application</b> | A computer program developed specifically to be run and accessed via a web browser                                                                                                                      |
| <b>Web framework</b>   | A system providing generic functionality; offers ready-made solutions to common web development idioms and design patterns and can be selectively changed by user-defined code.                         |

**Table S2. Related to Table 1. Comparison of OMERO/OMERO.iviewer and OMERO Plus/PathViewer for image viewing**

| Feature or Component       | OMERO.iviewer (OMERO)                                                         | PathViewer (OMERO Plus)                                                                                                                                                                                                                                                                                                             |
|----------------------------|-------------------------------------------------------------------------------|-------------------------------------------------------------------------------------------------------------------------------------------------------------------------------------------------------------------------------------------------------------------------------------------------------------------------------------|
| Multi-image views          | Supported in newer versions                                                   | Supported and tailored to digital pathology workflows                                                                                                                                                                                                                                                                               |
| Loading images             | Support for multi-resolution, tiled images                                    | Support for multi-resolution, tiled images <ul style="list-style-type: none"> <li>• Support for acceleration through tile microservice</li> <li>• Support for selecting tile sizes and compression parameters</li> <li>• Support for image flipping through tile microservice</li> <li>• Predictive preloading of images</li> </ul> |
| Annotation tools           | Basic tools required for marking and annotating regions of interest (ROIs)    | Extended features for ROI annotation, including improved freehand drawing and detailed rich formatted descriptions <ul style="list-style-type: none"> <li>• Rich formatted descriptions allowed at Image and Channel levels</li> </ul>                                                                                              |
| Multichannel image support | Supported                                                                     | Supported <ul style="list-style-type: none"> <li>• Ability to organize channels into custom-named groups and toggle on/off</li> <li>• Intuitive design for adjusting brightness and contrast</li> </ul>                                                                                                                             |
| Portability                | Parametric URL available from right-click; status of ROI display not included | Parametric URLs to share exact viewing settings available from Location bar                                                                                                                                                                                                                                                         |
| Metadata                   | Basic metadata visible in separate Info tab; map annotations not supported    | Annotations and map annotations viewable in Properties panel, along with image info and description                                                                                                                                                                                                                                 |

Sources: Glencoe Software, Inc. (n.d.). *PathViewer*. <http://www.glencoesoftware.com/products/pathviewer/features/> and University of Dundee & Open Microscopy Environment. (n.d.). *OMERO.iviewer*. <http://www.openmicroscopy.org/omero/iviewer/>
